# Supplementary material for: Rapid Prediction of Bacterial Heterotrophic Fluxomics Using Machine Learning and Constraint Programming
Source: PLoS Comput Biol. 2016 Apr 19;12(4):e1004838. doi: 10.1371/journal.pcbi.1004838 (PMC4836714; doi:10.1371/journal.pcbi.1004838)
Supplement: S1 Table — Detailed information for 20 cases studies using MFlux, including literature references, input conditions, 13C-MFA flux, the flux profiles predicted by ML, and the flux profiles predicted by MFlux with additional constraints. (XLSX) [file pcbi.1004838.s002.xlsx]

## Sheet: Summary
	Summary of 20 case studies
Case number	Root mean squared error (RMSE)
	Average flux	ML	MFlux	Sheet	Reference
1	27.0755	6.88477	6.51153	Complete_MFA	Crown SB, Long CP, Antoniewicz MR (2015) Integrated 13C-metabolic flux analysis of 14 parallel labeling experiments in Escherichia coli. Metabolic Engineering 28: 151-158.
2	23.871	17.5157	10.6301	Ecoli_KO	Fong SS, Nanchen A, Palsson BO, Sauer U (2006) Latent Pathway Activation and Increased Pathway Capacity Enable Escherichia coli Adaptation to Loss of Key Metabolic Enzymes. Journal Of Biological Chemistry 281: 8024-8033.
3	22.7852	16.8285	8.17924	Ecoli_KO	Fong SS, Nanchen A, Palsson BO, Sauer U (2006) Latent Pathway Activation and Increased Pathway Capacity Enable Escherichia coli Adaptation to Loss of Key Metabolic Enzymes. Journal Of Biological Chemistry 281: 8024-8033.
4	22.0875	16.5288	7.56968	Ecoli_KO	Fong SS, Nanchen A, Palsson BO, Sauer U (2006) Latent Pathway Activation and Increased Pathway Capacity Enable Escherichia coli Adaptation to Loss of Key Metabolic Enzymes. Journal Of Biological Chemistry 281: 8024-8033.
5	20.9283	7.0214	6.89928	Bacillus_1-3	Tannler S, Decasper S, Sauer U (2008) Maintenance metabolism and carbon fluxes in Bacillus species. Microbial Cell Factories 7: 19.
6	22.3295	8.78066	8.19756	Bacillus_1-3	Tannler S, Decasper S, Sauer U (2008) Maintenance metabolism and carbon fluxes in Bacillus species. Microbial Cell Factories 7: 19.
7	27.1994	5.91608	5.31977	Bacillus_1-3	Tannler S, Decasper S, Sauer U (2008) Maintenance metabolism and carbon fluxes in Bacillus species. Microbial Cell Factories 7: 19.
8	58.5214	4.46094	3.17805	Bacillus_differentCarbon	Chubukov V, Uhr M, Le Chat L, Kleijn RJ, Jules M, et al. (2013) Transcriptional regulation is insufficient to explain substrate-induced flux changes in Bacillus subtilis. Molecular Systems Biology 9
9	36.0927	4.219	3.24037	Bacillus_differentCarbon	Chubukov V, Uhr M, Le Chat L, Kleijn RJ, Jules M, et al. (2013) Transcriptional regulation is insufficient to explain substrate-induced flux changes in Bacillus subtilis. Molecular Systems Biology 9
10	55.8374	4.1833	3.33167	Bacillus_differentCarbon	Chubukov V, Uhr M, Le Chat L, Kleijn RJ, Jules M, et al. (2013) Transcriptional regulation is insufficient to explain substrate-induced flux changes in Bacillus subtilis. Molecular Systems Biology 9
11	24.0492	5.89067	4.32435	Bacillus_differentCarbon	Chubukov V, Uhr M, Le Chat L, Kleijn RJ, Jules M, et al. (2013) Transcriptional regulation is insufficient to explain substrate-induced flux changes in Bacillus subtilis. Molecular Systems Biology 9
12	14.7	9.4	8.8	Corynebacterium_1	Van Ooyen J, Noack S, Bott M, Reth A, Eggeling L (2012) Improved L-lysine production with Corynebacterium glutamicum and systemic insight into citrate synthase flux and activity. Biotechnology And Bioengineering 109: 2070-2081.
13	15.8023	11.6576	10.0846	Corynebacterium_2	Bommareddy RR, Chen Z, Rappert S, Zeng A-P (2014) A de novo NADPH generation pathway for improving lysine production of Corynebacterium glutamicum by rational design of the coenzyme specificity of glyceraldehyde 3-phosphate dehydrogenase. Metabolic Engineering 25: 30-37.
14	27.1001	4.12311	3.40588	Pesudomonas	Wang Z-J, Wang P, Liu Y-W, Zhang Y-M, Chu J, et al. (2012) Metabolic flux analysis of the central carbon metabolism of the industrial vitamin B12 producing strain Pseudomonas denitrificans using 13C-labeled glucose. Journal of the Taiwan Institute of Chemical Engineers 43: 181-187.
15	21.5692	2.86356	3.57771	Pesudomonas	Wang Z-J, Wang P, Liu Y-W, Zhang Y-M, Chu J, et al. (2012) Metabolic flux analysis of the central carbon metabolism of the industrial vitamin B12 producing strain Pseudomonas denitrificans using 13C-labeled glucose. Journal of the Taiwan Institute of Chemical Engineers 43: 181-187.
16	34.4282	4.03733	2.98329	Geobacillius	Tang YJ, Sapra R, Joyner D, Hazen TC, Myers S, et al. (2009) Analysis of metabolic pathways and fluxes in a newly discovered thermophilic and ethanol-tolerant Geobacillus strain. Biotechnology And Bioengineering 102: 1377-1386.
17	46.7454	6.49615	4.07431	Thermoanaerobacter	Hemme CL, Fields MW, He Q, Deng Y, Lin L, et al. (2011) Correlation of genomic and physiological traits to biofuel yields in Thermoanaerobacter species. Applied And Environmental Microbiology.
18	46.6094	6.58027	4.32435	Thermoanaerobacter	Hemme CL, Fields MW, He Q, Deng Y, Lin L, et al. (2011) Correlation of genomic and physiological traits to biofuel yields in Thermoanaerobacter species. Applied And Environmental Microbiology.
19	62.1465	5.09902	4	Desulfovibrio	Tang Y, Pingitore F, Mukhopadhyay A, Phan R, Hazen TC, et al. (2007) Pathway Confirmation and Flux Analysis of Central Metabolic Pathways in Desulfovibrio vulgaris Hildenborough using Gas Chromatography-Mass
20	60.1845	5.0892	3.56371	Geobacter	Tang YJ, Chakraborty R, Martin HG, Chu J, Hazen TC, et al. (2007) Flux Analysis of Central Metabolic Pathways in Geobacter metallireducens during Reduction of Soluble Fe(III)-Nitrilotriacetic Acid. Applied And Environmental Microbiology 73: 3859-3864.
average	33.5031	7.6788	5.60978
	ML = machine learning

## Sheet: Complete_MFA
Reference	Crown SB, Long CP, Antoniewicz MR (2015) Integrated 13C-metabolic flux analysis of 14 parallel labeling experiments in Escherichia coli. Metabolic Engineering 28: 151-158.
Species	Genetic background	carbon source	growth rate (h-1)	substrate uptake rate	oxygen condition	reactor			specific constraints
E. coli	wild type	glucose	0.72	10.47	aerobic	bioreactor			None
		case 1
	13C-flux	ML	MFlux
v1 EMP	99.9998	100	100
v2 EMP	71.6463	73.304	73.304
v3 EMP	82.6365	80.011	81.115
v4 EMP	82.6365	79.94	81.115
v5 EMP	170.524	175.806	173.152
v6 EMP	157.562	164.572	164.572
v7 EMP	127.073	130.126	130.126
v8	113.986	116.577	116.577
v9	66.7958	73.779	73.779
v10	26.8112	26.834	24.233
v11	25.4006	17.194	19.109
v12	11.5244	8.675	8.264
v13	13.8762	11.484	10.846
v14	7.1	5.825	5.797
v15	4.4	2.522	2.466
v16	7.1	5.67	5.797
v17 TCA cycle	19.0267	25.636	33.527
v18 TCA cycle	19.0267	41.079	33.527
v19 TCA cycle	16.552	30.506	30.166
v20 TCA cycle	4.89059	19.309	15.987
v21 TCA cycle	10.9164	18.988	19.348
v22 TCA cycle	13.7076	18.542	19.348
v23 TCA cycle	10.8709	12.846	20.329
v24 Glyoxylate	2.47471	4.043	3.361
v25 ED	1.41062	1.487	5.124
v26 ETOH	0	0.064	0.166
v27 LAC	0	-0.015	-0.015
v28	24.6735	15.469	15.469
v29	5.31142	1.403	2.38
RMSE		6.88477	6.51153

## Sheet: Ecoli_KO
Reference	Fong SS, Nanchen A, Palsson BO, Sauer U (2006) Latent Pathway Activation and Increased Pathway Capacity Enable Escherichia coli Adaptation to Loss of Key Metabolic Enzymes. Journal Of Biological Chemistry 281: 8024-8033.
Species	Carbon source	Genetic background	growth rate (h-1)	substrate uptake rate	oxygen condition	reactor				specific constraints
E. coli	glucose	knockout	0.22	3	aerobic	baffled shake flask				V9>=30	v24>=40	v28<=0
E. coli	glucose	knockout	0.55	8.1	aerobic	baffled shake flask				V9>=30	v24>=40	v28<=0
E. coli	glucose	knockout	0.56	7.8	aerobic	baffled shake flask				V9>=30	v24>=40	v28<=0
	case 2				case 3				case 4
	13C-flux	ML	MFlux		13C-flux	ML	MFlux		13C-flux	ML	MFlux
v1 EMP	100	100.157	100	v1 EMP	100	100.003	100	v1 EMP	100	100.057	100
v2 EMP	62	65.02	61.011	v2 EMP	61	67.63	67.631	v2 EMP	61	67.82	67.821
v3 EMP	76.6667	79.095	79.118	v3 EMP	76.25	78.992	79.424	v3 EMP	74.6667	79.169	79.573
v4 EMP	76.6667	79.209	79.118	v4 EMP	76.25	79.835	79.424	v4 EMP	74.6667	79.976	79.573
v5 EMP	166.667	161.714	161.714	v5 EMP	165	166.981	166.955	v5 EMP	162.667	166.584	166.582
v6 EMP	156	141.963	141.963	v6 EMP	151	156.082	156.082	v6 EMP	149	155.395	155.395
v7 EMP	156	125.432	125.432	v7 EMP	150	122.441	122.441	v7 EMP	147	121.078	121.078
v8	149	118.657	139.467	v8	144	117.76	128.066	v8	147	116.251	125.991
v9	37	31.187	30	v9	35	42.111	30	v9	32	40.36	30
v10	38	35.098	38.989	v10	39	28.994	27.427	v10	38	28.902	27.255
v11	30	52.991	38.989	v11	31	26.689	25.039	v11	29	26.249	24.972
v12	16.6667	18.927	18.217	v12	15	16.114	12.755	v12	13.3333	16.123	12.71
v13	13.3333	5.886	20.771	v13	16.25	8.68	12.284	v13	16	9.125	12.262
v14	10	7.481	9.109	v14	8.75	5.905	6.378	v14	8	5.939	6.355
v15	6.66667	7.002	9.109	v15	6.25	5.269	6.378	v15	5.33333	5.27	6.355
v16	10	7.395	9.109	v16	8.75	5.32	6.378	v16	8	5.341	6.355
v17 TCA cycle	53	61.457	69.467	v17 TCA cycle	51	48.764	58.066	v17 TCA cycle	54	47.901	55.99
v18 TCA cycle	53	78.068	69.467	v18 TCA cycle	51	52.976	58.066	v18 TCA cycle	54	49.379	55.99
v19 TCA cycle	11	44.112	29.467	v19 TCA cycle	11	40.004	18.066	v19 TCA cycle	11	37.822	15.99
v20 TCA cycle	0	39.284	16.972	v20 TCA cycle	0	33.976	9.851	v20 TCA cycle	0	33.013	8.873
v21 TCA cycle	42	49.521	56.972	v21 TCA cycle	40	32.251	49.851	v21 TCA cycle	43	31.36	48.873
v22 TCA cycle	42	46.304	56.972	v22 TCA cycle	40	50.029	49.851	v22 TCA cycle	43	49.05	48.873
v23 TCA cycle	73	40.899	78.975	v23 TCA cycle	70	25.773	69.427	v23 TCA cycle	67	25.299	69.093
v24 Glyoxylate	42	7.169	40	v24 Glyoxylate	40	5.429	40	v24 Glyoxylate	43	5.598	40
v25 ED	8	1.673	0	v25 ED	7	0.857	2.388	v25 ED	9	0.685	2.283
v26 ETOH	0	-0.088	0	v26 ETOH	0	0.247	0	v26 ETOH	0	0.344	0
v27 LAC	0	-0.119	-0.119	v27 LAC	0	-0.074	-0.074	v27 LAC	0	-0.113	-0.113
v28	-7	14.263	0	v28	-6	26.34	0	v28	0	25.603	0
v29	11	13.028	17.997	v29	10	14.727	20.424	v29	19	14.064	19.78
RMSE		17.5157	10.6301			16.8285	8.17924			16.5288	7.56968

## Sheet: Bacillus_1-3
Reference	Tannler S, Decasper S, Sauer U (2008) Maintenance metabolism and carbon fluxes in Bacillus species. Microbial Cell Factories 7: 19.
Species	Carbon source	Reactor	Oxygen Condition	Nutrient-limited	Genetic background	Growth rate (h-1)	Substrate uptake rate (mmol*g-1*h-1)				Acetate		specific constraints
B. subtilis	glucose	baffled shake flask	aerobic	sufficient	wild type	0.67	8.71				4.28		None
B. subtilis	glucose	baffled shake flask	aerobic	sufficient	knockout	0.71	11.3				7.02		None
B. subtilis	glucose	CSTR	aerobic	carbon limitation	wild type	0.19	2.93				0		None
	case 5			case 6				case 7
	13C-flux	ML	MFlux	13C-flux	ML	MFlux	13C-flux	ML	MFlux
v1 EMP	100	99.395	100	100	98.85	100	100	99.04	100
v2 EMP	66.2841	63.071	63.065	66.8303	60.559	58.6	66.4446	65.341	65.341
v3 EMP	82.6135	81.12	81.052	83.5513	79.155	79.977	82.8282	83.645	82.873
v4 EMP	82.6135	80.984	81.052	83.5513	80.17	79.977	82.8282	82.101	82.873
v5 EMP	170.868	170.168	170.168	173.366	172.416	171.684	169.934	167.653	167.653
v6 EMP	158.821	158.492	158.492	162.553	167.118	167.118	161.226	158.507	158.507
v7 EMP	162.04	130.239	130.24	159.21	128.764	128.764	168.847	172.531	172.531
v8	103.325	94.621	94.621	113.114	107.193	107.193	113.825	104.875	105.402
v9	45.7974	43.16	43.16	62.1499	47.647	47.647	0	0.937	0.098
v10	31.8795	34.236	36.213	31.7593	37.327	41.4	29.2382	33.869	34.142
v11	31.8795	35.667	36.212	31.7593	42.641	41.4	29.2382	36.683	34.135
v12	16.3295	20.439	19.728	16.721	20.206	19.808	16.3836	16.155	18.767
v13	15.55	18.849	16.484	15.0383	24	21.592	12.8546	11.963	15.368
v14	9.96676	11.042	11.352	9.96978	10.477	11.731	9.56478	11.054	11.003
v15	6.3627	8.886	8.377	6.75122	8.718	8.077	6.81882	7.622	7.764
v16	9.96676	11.869	11.352	9.96978	13.212	11.731	9.56478	10.895	11.003
v17 TCA cycle	49.4903	42.496	47.79	44.3242	45.856	47.451	100.708	100.367	105.159
v18 TCA cycle	49.4903	49.362	47.79	44.3242	36.75	47.451	100.708	116.03	105.159
v19 TCA cycle	49.4903	51.511	47.79	44.3242	59.747	47.451	100.708	99.465	105.159
v20 TCA cycle	39.8257	31.052	31.212	35.7188	38.646	37.047	92.2455	89.82	87.767
v21 TCA cycle	39.8257	31.571	31.212	35.7188	33.455	37.047	92.2455	83.158	87.767
v22 TCA cycle	39.8257	33.033	35.592	35.7188	50.496	45.747	92.2455	103.381	97.704
v23 TCA cycle	31.7659	29.227	26.21	19.2203	26.112	31.713	77.8795	87.573	94.268
v24 Glyoxylate	0	-1.685	0	0	-2.799	0	0	-0.564	0
v25 ED	0	-1.009	0	0	-0.599	0	0	-0.068	0.007
v26 ETOH	0	-0.04	0.133	0	-0.169	0.046	0	0.516	0.144
v27 LAC	0	-0.009	-0.009	0	0.073	0.073	0	0.028	0.028
v28	32.98	30.87	30.87	38.76	27.892	27.892	35.24	23.461	23.461
v29	8.06	9.775	9.381	16.5	13.304	14.035	14.37	2.562	3.436
RMSE		7.0214	6.89928		8.78066	8.19756		5.91608	5.31977

## Sheet: Bacillus_differentCarbon
Reference	Chubukov V, Uhr M, Le Chat L, Kleijn RJ, Jules M, et al. (2013) Transcriptional regulation is insufficient to explain substrate-induced flux changes in Bacillus subtilis. Molecular Systems Biology 9
Species	Carbon source	Reactor	Oxygen Condition	Nutrient-limited	Genetic background	Growth rate (h-1)	Substrate uptake rate (mmol*g-1*h-1)			specific constraints
B. subtilis	succinate + glutamate (natural-labeled 80% or 20% U-labeled)	non-baffled flask	aerobic	sufficient	knockout	0.22	3.35+2.21			None
B. subtilis	glycerol (natural-labeled 80% or 20% U-labeled)	non-baffled flask	aerobic	sufficient	knockout	0.4	6.22			None
B. subtilis	malate (natural-labeled 80% or 20% U-labeled)	non-baffled flask	aerobic	sufficient	knockout	0.57	26.51			None
B. subtilis	fructose	non-baffled flask	aerobic	sufficient	knockout	0.53	5.72			None
		succinate + glutamate			glycerol			Malate			Fructose
	case 8			case 9			case 10			case 11
	13C-flux	ML	MFlux	13C-flux	ML	MFlux	13C-flux	ML	MFlux	13C-flux	ML	MFlux
v1 EMP	0	0.986	0	0	1.006	0	0	0.993	0	0	1.003	0
v2 EMP	-7.07627	-4.965	-8.236	-2.41475	-4.444	-5.683	-8.28077	-10.346	-10.642	-26.4953	-16.439	-19.533
v3 EMP	-6.47653	-4.978	-4.263	-5.06131	-4.209	-4.767	-4.75444	-4.194	-4.42	83.9	90.514	89.729
v4 EMP	-6.47653	-6.342	-4.263	94.9387	94.737	95.233	-4.75444	-4.676	-4.42	83.9	88.943	89.729
v5 EMP	0	2.205	-6.539	76.8585	79.191	79.212	0	-2.269	-5.728	152.2	149.944	152.289
v6 EMP	-23.2946	-21.036	-21.036	76.8585	79.165	79.145	-13.5316	-11.25	-11.25	152.2	154.423	152.289
v7 EMP	45.7933	45.978	45.978	72.1651	74.919	74.919	43.7293	46.427	46.427	143.748	146.474	146.474
v8	44.026	41.917	41.918	41.6742	43.923	43.923	52.7378	50.63	52.687	88.6685	90.886	90.886
v9	6.92484e-07	-2.883	-2.883	1.76616	4.588	4.588	39.0723	39.789	36.51	10.9704	8.215	8.215
v10	4.20885	4.221	8.236	0.126665	0.161	5.683	7.53362	7.503	10.642	23.4023	23.431	19.533
v11	4.20885	15.588	8.236	0.126665	11.5	5.683	7.53362	15.325	10.642	23.4023	16.27	19.533
v12	0.599734	1.869	2.58	-2.64656	-1.308	-0.431	3.52633	4.742	5.097	10.3952	12.104	9.593
v13	3.60912	3.748	5.657	2.77322	2.894	6.115	4.00729	3.914	5.544	13.0071	12.884	9.94
v14	1.23862	0.701	1.987	-0.222581	0.321	0.463	2.29657	2.521	3.111	7.19537	7.71	7.197
v15	-0.638882	0.233	0.593	-2.42398	-1.622	-0.894	1.22976	1.585	1.986	3.19987	2.423	2.395
v16	1.23862	1.705	1.987	-0.222581	0.296	0.463	2.29657	2.744	3.111	7.19537	6.697	7.197
v17 TCA cycle	35.2516	35.308	42.761	32.2242	32.157	38.354	10.6748	10.674	16.177	66.278	66.314	72.909
v18 TCA cycle	35.2516	37.191	42.761	32.2242	34.051	38.354	10.6748	12.607	16.177	66.278	67.233	72.909
v19 TCA cycle	35.2516	54.185	41.162	32.2242	48.853	38.354	10.6748	26.757	16.177	66.278	85.18	72.909
v20 TCA cycle	69.2827	67.265	65.549	26.0481	25.207	26.404	7.57112	5.6	5.52	55.3356	57.313	59.347
v21 TCA cycle	129.535	126.551	127.398	26.0481	29.095	26.404	7.57112	8.514	5.52	55.3356	63.916	59.347
v22 TCA cycle	129.535	126.501	127.398	26.0481	29.042	26.718	7.57112	5.464	5.52	55.3356	58.37	63.543
v23 TCA cycle	111.422	108.098	110.611	10.0029	13.268	16.009	68.5446	71.724	75.428	37.7022	40.999	34.898
v24 Glyoxylate	0	3.398	1.599	0	-0.39	0	0	-6.456	0	0	-2.41	0
v25 ED	0	-1.497	0	0	0.409	0	0	0.856	0	0	-11.982	0
v26 ETOH	0	0.078	0.094	0	0.092	0.102	0	0.019	0	0	-0.018	0.082
v27 LAC	0	-0.024	-0.024	0	0.009	0.009	0	-0.033	-0.033	0	-0.029	-0.029
v28	-67.6099	-65.455	-65.455	31.585	29.5	29.5	-53.058	-55.328	-55.328	45.4433	47.679	47.679
v29	18.112	18.058	18.386	16.0452	10.351	10.709	39.0265	29.609	30.092	17.6334	29.441	28.645
RMSE		4.46094	3.17805		4.219	3.24037		4.1833	3.33167		5.89067	4.32435

## Sheet: Corynebacterium_1
Reference	Van Ooyen J, Noack S, Bott M, Reth A, Eggeling L (2012) Improved L-lysine production with Corynebacterium glutamicum and systemic insight into citrate synthase flux and activity. Biotechnology And Bioengineering 109: 2070-2081.
Species	Carbon Source	Reactor	Oxygen Condition	Nutrient-limited	Genetic background	Growth rate (h-1)	Substrate uptake rate (mmol*g-1*h-1)
C. glutamicium	glucose	bioreactor	aerobic	sufficient	knockout	0.35	3.75
	case 12
	13C-flux	ML	MFlux
v1 EMP	100	100.044	100
v2 EMP	66.9	45.268	45.269
v3 EMP	81.4	76.307	76.42
v4 EMP	81.4	76.533	76.42
v5 EMP	168.5	166.123	166.123
v6 EMP	155.6	153.413	153.413
v7 EMP	150.369	147.613	147.613
v8	89.4	78.44	78.44
v9	0	0.898	0.9
v10	31.3	57.91	50.534
v11	31.3	44.785	50.534
v12	15.1	27.917	27.908
v13	16.3	24.886	22.626
v14	8.7	14.633	16.022
v15	6.4	12.623	11.886
v16	8.7	17.71	16.022
v17 TCA cycle	64	58.611	55.261
v18 TCA cycle	64	62.156	55.261
v19 TCA cycle	64	45.015	55.261
v20 TCA cycle	53.3	51.233	50.187
v21 TCA cycle	43.1	47.838	50.187
v22 TCA cycle	55.5	52.406	55.611
v23 TCA cycle	64.1	55.663	51.883
v24 Glyoxylate	0	5.034	0
v25 ED	0	0.482	0
v26 ETOH	0	0.047	0.117
v27 LAC	0	0.011	0.011
v28	32.7	30.779	30.779
v29	N.A.	4.221	3.728
RMSE		9.39149	8.82043

## Sheet: Corynebacterium_2
Reference	Bommareddy RR, Chen Z, Rappert S, Zeng A-P (2014) A de novo NADPH generation pathway for improving lysine production of Corynebacterium glutamicum by rational design of the coenzyme specificity of glyceraldehyde 3-phosphate dehydrogenase. Metabolic Engineering 25: 30-37.
Species	Carbon Source	Reactor	Oxygen Condition	Nutrient-limited	Genetic background	Growth rate (h-1)	Substrate uptake rate (mmol*g-1*h-1)			specific constraints
C. glutamicium	glucose	bioreactor	aerobic	sufficient	mutation	0.2	4.5			v28 <= 0
	case 13
	13C-flux	ML	MFlux
v1 EMP	100	99.667	100
v2 EMP	40.2	43.776	43.092
v3 EMP	70.9	75.251	75.388
v4 EMP	70.9	75.535	75.388
v5 EMP	155.9	169.304	169.303
v6 EMP	147.6	164.254	164.254
v7 EMP	147.8	164.987	164.987
v8	70.6	84.312	84.312
v9	1.1	6.578	6.578
v10	55.1	58.895	56.9
v11	55.1	52.994	53.713
v12	32.5	28.547	29.125
v13	22.6	24.335	24.588
v14	17.8	14.707	16.254
v15	14.7	13.004	12.871
v16	17.8	17.853	16.254
v17 TCA cycle	50.2	65.364	63.853
v18 TCA cycle	50.2	66.58	63.853
v19 TCA cycle	50.2	54.916	59.155
v20 TCA cycle	42.1	59.064	57.158
v21 TCA cycle	42.1	58.241	61.856
v22 TCA cycle	42.1	59.62	61.857
v23 TCA cycle	42.1	61.267	59.421
v24 Glyoxylate	0	4.331	4.698
v25 ED	0	1.644	3.187
v26 ETOH	0	-0.036	0.098
v27 LAC	2.2	0.199	0.199
v28	28.5	26.419	26.419
v29	N.A.	7.375	7.134
RMSE		11.6576	10.0846

## Sheet: Pesudomonas
Reference	Wang Z-J, Wang P, Liu Y-W, Zhang Y-M, Chu J, et al. (2012) Metabolic flux analysis of the central carbon metabolism of the industrial vitamin B12 producing strain Pseudomonas denitrificans using 13C-labeled glucose. Journal of the Taiwan Institute of Chemical Engineers 43: 181-187.
Species		Carbon source	Reactor	Oxygen Condition	Nutrient-limited	Genetic background	Growth rate (h-1)	Substrate uptake rate (mmol*g-1*h-1)			Specific constraints
Pseudomonas denitriﬁcans		glucose	bioreactor	micro-aerobic	sufficient	wild type	0.165	0.82			None
Pseudomonas denitriﬁcans		glucose	bioreactor	aerobic	sufficient	wild type	0.238	1.24			None
	case 14			case 15
	13C-flux	ML	MFlux	13C-flux	ML	MFlux
v1 EMP	100	99.538	100	100	99.049	100
v2 EMP	1.1	3.157	2.397	1.8	-0.159	-0.159
v3 EMP	7.6	9.13	8.456	18.6	17.07	17.747
v4 EMP	7.6	7.781	8.456	18.6	18.425	17.747
v5 EMP	96.7	99.026	99.026	109.5	107.322	107.322
v6 EMP	84.5	86.654	86.654	90.7	88.512	88.512
v7 EMP	97.2	100.019	100.019	123.8	121.076	121.076
v8	106.7	104.474	104.474	96.9	99.168	99.168
v9	0	-0.959	-0.959	0	2.74	2.74
v10	97.7	97.697	97.603	97.1	97.1	96.321
v11	18	20.341	19.727	33.1	25.078	29.868
v12	9.1	10.373	10.386	21.6	20.316	18.73
v13	8.9	8.742	9.341	11.5	11.619	11.138
v14	5.6	6.103	5.871	11.8	11.341	11.138
v15	3.5	4.324	4.515	9.8	9.027	7.592
v16	5.6	5.56	5.871	11.8	12.28	11.138
v17 TCA cycle	86.4	86.394	81.541	78.6	78.642	77.897
v18 TCA cycle	86.4	84.537	81.541	78.6	76.753	77.897
v19 TCA cycle	86	67.12	74.968	79	72.724	72.325
v20 TCA cycle	73.1	71.14	65.984	65	67.059	60.944
v21 TCA cycle	70	66.986	72.557	59	62.052	66.516
v22 TCA cycle	70	67.02	72.557	59	61.95	66.516
v23 TCA cycle	70	66.782	67.39	59	62.415	68.04
v24 Glyoxylate	0	6.221	6.573	0	6.481	5.572
v25 ED	79.7	78.209	77.876	64.1	65.697	66.452
v26 ETOH	0	0.079	0.135	0	0.061	0.219
v27 LAC	0	-0.124	-0.124	0	-0.028	-0.028
v28	23.7	21.537	21.537	27.3	25.172	25.172
v29	NA	11.661	11.74	NA	3.314	4.048
RMSE		4.12311	3.40588		2.86356	3.57771

## Sheet: Geobacillius
Reference	Tang YJ, Sapra R, Joyner D, Hazen TC, Myers S, et al. (2009) Analysis of metabolic pathways and fluxes in a newly discovered thermophilic and ethanol-tolerant Geobacillus strain. Biotechnology And Bioengineering 102: 1377-1386.
Species	Carbon Source	Reactor	Oxygen Condition	Nutrient-limited	Genetic background	Growth rate (h-1)	Substrate uptake rate (mmol*g-1*h-1)		Specific constraints
Geobacillus thermoglucosidasius	glucose	non-baffled flask	micro-aerobic	sufficient	wild type	0.2	5		None
	case 16
	13C-flux	ML	MFlux
v1 EMP	100	99.429	100
v2 EMP	80	82.022	80.522
v3 EMP	91	92.555	91.506
v4 EMP	91	91.223	91.506
v5 EMP	187	184.672	184.672
v6 EMP	181	178.879	178.879
v7 EMP	192.5	195.265	195.265
v8	112	109.84	114.103
v9	46	48.907	42.113
v10	19.5	19.516	19.477
v11	19.5	20.299	19.352
v12	10.5	9.255	10.387
v13	9	8.901	8.966
v14	6	5.484	5.492
v15	4.5	5.295	4.894
v16	6	5.499	5.492
v17 TCA cycle	25	25.01	31.132
v18 TCA cycle	25	26.958	31.132
v19 TCA cycle	10.5	29.508	15.035
v20 TCA cycle	7	7.571	5.987
v21 TCA cycle	21.5	18.527	22.084
v22 TCA cycle	21.5	24.563	30.777
v23 TCA cycle	36	39.274	35.079
v24 Glyoxylate	14.5	18.029	16.097
v25 ED	0	1.618	0.125
v26 ETOH	28	28.019	24.761
v27 LAC	73	72.939	72.939
v28	-7.5	-5.343	-3.947
v29	NA	12.751	11.795
RMSE		4.03733	2.98329

## Sheet: Thermoanaerobacter
Reference	Hemme CL, Fields MW, He Q, Deng Y, Lin L, et al. (2011) Correlation of genomic and physiological traits to biofuel yields in Thermoanaerobacter species. Applied And Environmental Microbiology.
Species	Carbon source	Reactor	Oxygen Condition	Nutrient-limited	Genetic background	Growth rate (h-1)	Substrate uptake rate (mmol*g-1*h-1)			Specific constraints
Thermoanaerobacter	xylose	closed bottle	anaerobic	sufficient	wild type	0.034	2.3			None
Thermoanaerobacter	xylose	closed bottle	anaerobic	sufficient	wild type	0.022	1.5			None
	case 17			case 18
		X514			39E
	13C-flux	ML	MFlux	13C-flux	ML	MFlux
v1 EMP	0	1	0	0	1.054	0
v2 EMP	-1	3.014	-4.88	-1	2.995	-5.232
v3 EMP	65	66.398	65.039	65	66.6	64.922
v4 EMP	65	65.093	65.039	65	65.17	64.922
v5 EMP	163	160.797	160.877	163	160.889	161.96
v6 EMP	163	160.725	160.652	163	160.911	161.958
v7 EMP	171	169.528	169.528	171	168.401	165.386
v8	152	154.249	155.731	153	153.275	153.793
v9	21	23.772	21.411	24	21.298	20.471
v10	0	-0.374	4.88	0	0.036	5.232
v11	0	11.223	4.88	0	11.341	5.232
v12	-33	-10.258	-30.08	-33	-10.03	-29.845
v13	33	32.88	34.96	33	33.138	35.078
v14	33	32.49	34.96	33	32.678	35.077
v15	33	32.194	34.96	33	32.365	35.077
v16	33	32.509	34.96	33	32.75	35.077
v17 TCA cycle	1	0.98	6.509	1	1.302	6.769
v18 TCA cycle	1	2.953	6.509	1	2.843	6.769
v19 TCA cycle	1	19.533	6.509	1	19.912	6.769
v20 TCA cycle	0	1.762	2.024	0	2.025	2.341
v21 TCA cycle	0	2.611	2.024	0	3.051	2.341
v22 TCA cycle	0	2.561	11.144	0	2.985	12.443
v23 TCA cycle	8	10.363	8.711	8	11.347	10.197
v24 Glyoxylate	0	-4.709	0	0	-4.371	0
v25 ED	0	-1.378	0	0	-1.592	0
v26 ETOH	129	128.943	127.81	127	126.948	126.552
v27 LAC	10	10.005	10.005	8	8.011	8.011
v28	-8	-5.973	-2.201	-8	-5.899	-3.428
v29	-8	3.755	2.433	-8	3.701	2.246
RMSE		6.49615	4.07431		6.58027	4.32435

[truncated: 2 more sheets: Desulfovibrio, Geobacter]
